# Supplementary material for: Effects of Nitisinone on Oxidative and Inflammatory Markers in Alkaptonuria: Results from SONIA1 and SONIA2 Studies
Source: MDPI journal article supplement (doi:10.3390/cells11223668), 2022-11-18
Supplement: s1 [file s1]

# Effects of nitisinone on oxidative and inflammatory markers in alkaptonuria: results from SONIA1 and SONIA2 studies

## Supplementary material

**Table S1.** Health questionnaires for SONIA2 patients.

| Questionnaire                                              | Description and items                                                                                                                                                                                            | Scale                                                        |
|------------------------------------------------------------|------------------------------------------------------------------------------------------------------------------------------------------------------------------------------------------------------------------|--------------------------------------------------------------|
| <b>Knee injury and Osteoarthritis Outcome Score (KOOS)</b> | Describes short- and long-term consequences of knee injury in five subscales [ <i>pain, other symptoms, function in daily living, function in sport and recreation, and knee-related quality of life (QoL)</i> ] | <b>0</b> (extreme problems)<br><b>100</b> (no problems)      |
| <b>Health Assessment Questionnaire (HAQ)</b>               | Includes a <i>disability index (haqdi)</i> and a <i>global pain visual analog scale (hapvas)</i>                                                                                                                 | <b>0</b> (no difficulties)<br><b>3</b> (unable to do).       |
| <b>Short Form-36 (SF-36)</b>                               | A multi-purpose short form questionnaire with 36 questions addressing both <i>physical</i> and <i>mental</i> components                                                                                          | <b>0</b> (maximum disability)<br><b>100</b> (no disability). |

**Table S2.** Summary of measurements in SONIA1 patients.

|                     |           | baseline           |                           | 4 weeks            |                           |
|---------------------|-----------|--------------------|---------------------------|--------------------|---------------------------|
|                     |           | n (min-max)        | median (25-75 percentile) | n (min - max)      | median (25-75 percentile) |
| <b>IL-8 (pg/mL)</b> | control   | 8 (1.290 – 19.25)  | 6.080 (3.345 – 8.025)     | 8 (4.890 – 18.48)  | 5.905 (5.133 – 14.27)     |
|                     | NTBC 1 mg | 8 (2.290 – 14.27)  | 6.085 (5.338 – 12.03)     | 8 (3.950 – 11.42)  | 5.725 (4.593 – 9.048)     |
|                     | NTBC 2 mg | 8 (1.340 – 14.07)  | 8.670 (2.235 – 9.610)     | 8 (2.020 – 12.59)  | 4.930 (2.243 – 9.200)     |
|                     | NTBC 4 mg | 8 (0.480 – 17.65)  | 5.180 (2.950 – 9.060)     | 8 (0.060 – 12.47)  | 3.270 (2.120 – 5.198)     |
|                     | NTBC 8 mg | 8 (2.980 – 18.26)  | 9.505 (5.188 – 10.70)     | 8 (2.070 – 16.18)  | 5.810 (5.153 – 9.265)     |
| <b>CRP (mg/L)</b>   | control   | 8 (0.3253 – 8.032) | 0.6508 (0.5052 – 5.223)   | 8 (0.2441 – 11.66) | 1.263 (0.8081 – 7.048)    |
|                     | NTBC 1 mg | 8 (0.117 – 5.335)  | 1.990 (0.7422 – 3.009)    | 8 (0.1856 – 10.79) | 2.490 (0.8890 – 8.628)    |
|                     | NTBC 2 mg | 8 (0.4564 – 20.83) | 1.344 (0.5872 – 2.676)    | 8 (0.3774 – 16.30) | 1.457 (1.103 – 3.103)     |
|                     | NTBC 4 mg | 8 (0.2243 – 2.016) | 0.9551 (0.2721 – 1.788)   | 8 (0.3491 – 4.919) | 1.612 (0.4391 – 2.232)    |
|                     | NTBC 8 mg | 8 (0.3728 – 8.275) | 2.759 (0.5618 – 5.999)    | 8 (0.3925 – 7.709) | 1.741 (0.6345 – 5.213)    |
| <b>SAA (mg/L)</b>   | control   | 8 (1.740 – 26.29)  | 5.104 (2.145 – 18.94)     | 8 (1.986 – 38.25)  | 3.109 (2.073 – 24.47)     |
|                     | NTBC 1 mg | 8 (1.527 – 21.89)  | 7.134 (2.911 – 15.62)     | 8 (2.601 – 57.40)  | 9.212 (4.036 – 26.75)     |
|                     | NTBC 2 mg | 8 (3.143 – 101.8)  | 9.510 (3.475 – 21.30)     | 8 (3.476 – 45.96)  | 14.73 (5.527 – 21.36)     |
|                     | NTBC 4 mg | 8 (2.476 – 16.61)  | 5.096 (3.045 – 13.80)     | 8 (2.029 – 37.26)  | 6.492 (6.293 – 12.69)     |
|                     | NTBC 8 mg | 8 (3.815 – 28.47)  | 12.84 (5.018 – 23.30)     | 8 (4.134 – 43.44)  | 14.95 (5.802 – 33.36)     |

**Table S3.** Summary of measurements in SONIA2 patients.

| group   | time (years) | AOPP $\mu\text{mol/dL}$ (chlor T eq) |                           |                               | SAA (mg/L)         |                           |                 |
|---------|--------------|--------------------------------------|---------------------------|-------------------------------|--------------------|---------------------------|-----------------|
|         |              | n (min-max)                          | median (25-75 percentile) | n > 30 $\mu\text{mol/dL}$ (%) | n (min-max)        | median (25-75 percentile) | n > 10 mg/L (%) |
| control | 0            | 68 (2.06 – 58.84)                    | 10.01 (7.72 – 13.92)      | 4 (5.9%)                      | 69 (1.921 – 305.7) | 26.21 (11.42 – 51.44)     | 54 (78.3%)      |
|         | 1            | 63 (1.95 – 58.89)                    | 10.13 (7.34 – 17.16)      | 4 (6.3%)                      | 63 (1.951 – 228.2) | 22.23 (10.89 – 53.15)     | 49 (77.8%)      |
|         | 2            | 62 (1.81 – 45.49)                    | 8.422 (6.24 – 10.90)      | 1 (1.6%)                      | 61 (2.478 – 280.2) | 22.25 (11.46 – 44.35)     | 47 (77.0%)      |
|         | 3            | 61 (2.80 – 32.16)                    | 8.131 (5.40 – 10.72)      | 1 (1.6%)                      | 61 (2.386 – 202.2) | 18.65 (9.969 – 34.18)     | 46 (75.4%)      |
|         | 4            | 53 (1.85 – 39.18)                    | 9.032 (6.90 – 12.02)      | 2 (3.8%)                      | 54 (1.093 – 237.1) | 29.16 (11.81 – 48.80)     | 43 (79.6%)      |
| NTBC    | 0            | 69 (2.93 – 15.75)                    | 10.56 (6.61 – 15.75)      | 3 (4.3%)                      | 69 (0.788 – 311.9) | 29.16 (15.34 – 64.55)     | 56 (81.2%)      |
|         | 1            | 67 (2.34 – 30.0)                     | 10.35 (6.66 – 14.10)      | 1 (1.5%)                      | 67 (1.934 – 197.6) | 41.28 (19.65 – 73.72)     | 60 (89.6%)      |
|         | 2            | 65 (2.53 – 41.05)                    | 8.869 (5.93 – 13.05)      | 2 (3.1%)                      | 65 (0.765 – 260.8) | 34.45 (21.11 – 86.33)     | 56 (86.2%)      |
|         | 3            | 60 (1.43 – 20.82)                    | 8.611 (6.31 – 12.76)      | 0                             | 60 (3.011 – 287.9) | 31.07 (16.07 – 69.89)     | 51 (85.0%)      |
|         | 4            | 56 (1.99 – 26.98)                    | 8.675 (6.94 – 14.98)      | 0                             | 56 (3.899 – 244.6) | 27.52 (13.54 – 67.13)     | 47 (83.9%)      |

**Table S4.** Summary of measurements in SONIA2 samples submitted to the analysis of protein carbonyls. Significantly different carbonylation is indicated in bold: reduced if fold-change  $\leq 0.5$ ; increased if fold-change  $\geq 2$ .

| patient ID | arm     | sex | SAA (mg/L) |              | AOPP $\mu\text{mol/dL}$ (chlor T eq) |              | cAKUSSI  |              | fold-change in protein carbonylation (end-of-study vs. baseline) |                              |            |
|------------|---------|-----|------------|--------------|--------------------------------------|--------------|----------|--------------|------------------------------------------------------------------|------------------------------|------------|
|            |         |     | baseline   | end of study | baseline                             | end of study | baseline | end of study | total                                                            | CERU                         | TRFE       |
| A          | control | M   | 1.921      | 1.931        | 3.469                                | 3.754        | 138      | 166          | <b>2.3</b>                                                       | carbonylated at end of study | <b>2.8</b> |
| B          | control | M   | 20.123     | 28.232       | 11.438                               | 11.954       | 58       | 53           | 1.1                                                              | carbonylated at end of study | <b>2.0</b> |
| C          | control | M   | 94.077     | 158.257      | 13.518                               | 12.084       | 66       | 85           | 1.0                                                              | 1.5                          | 1.3        |
| D          | control | F   | 6.412      | 8.486        | 10.887                               | 6.878        | 42       | 47           | 1.1                                                              | carbonylated at baseline     | 1.7        |
| E          | control | F   | 28.561     | 17.187       | 17.162                               | 10.567       | 65       | 93           | <b>0.3</b>                                                       | carbonylated at baseline     | 1.1        |
| F          | control | F   | 110.118    | 133.575      | 9.288                                | 10.199       | 106      | 115          | <b>2.0</b>                                                       | not detected                 | 0.9        |
| G          | NTBC    | M   | 3.899      | 3.899        | 9.503                                | 6.646        | 30       | 28           | <b>0.3</b>                                                       | carbonylated at baseline     | 0.9        |
| H          | NTBC    | M   | 29.159     | 29.895       | 7.102                                | 7.350        | 106      | 120          | 0.8                                                              | not detected                 | 0.6        |
| I          | NTBC    | M   | 128.099    | 239.182      | 7.916                                | 7.360        | 104      | 138          | <b>3.6</b>                                                       | carbonylated at end of study | <b>2.4</b> |
| L          | NTBC    | F   | 3.802      | 6.152        | 4.278                                | 1.987        | 85       | 92           | <b>2.2</b>                                                       | not detected                 | <b>2.1</b> |
| M          | NTBC    | F   | 25.732     | 27.519       | 10.772                               | 3.931        | 42       | 40           | <b>0.2</b>                                                       | carbonylated at baseline     | <b>0.4</b> |
| N          | NTBC    | F   | 126.888    | 99.182       | 5.819                                | 7.087        | 94       | 101          | <b>0.4</b>                                                       | not detected                 | <b>0.5</b> |
